# Supplementary material
Source: PubMed Central journal article supplement (PMC5975830)
Supplement: SC-007-C5SC03519H-s001.pdf [file SC-007-C5SC03519H-s001.pdf]

## Supporting Information

### Targeting Antioxidant Pathways with Ferrocenylated *N*-Heterocyclic Carbene Supported Gold(I) Complexes in A549 Lung Cancer Cells

J. F. Arambula,<sup>a\*</sup> R. McCall,<sup>a</sup> K. J. Sidoran,<sup>b</sup> D. Magda,<sup>c</sup> N. A. Mitchell,<sup>d</sup> C. W. Bielawski,<sup>e,f</sup> V. M. Lynch,<sup>g</sup> J. L. Sessler<sup>g</sup>, and K. Arumugam<sup>b\*</sup>

<sup>a</sup> Department of Chemistry, Georgia Southern University, Statesboro, Georgia, 30460, USA.

<sup>b</sup> Department of Chemistry, Wright State University, 3640 Colonel Glenn Hwy, Dayton, Ohio, 45435, USA.

<sup>c</sup> Lumiphore, Inc., Berkeley, California, 94710, USA.

<sup>d</sup> Department of Health Sciences, Gettysburg College, Gettysburg, PA 17325-1400

<sup>e</sup> Center for Multidimensional Carbon Materials, Institute for Basic Science, Ulsan 689-798, Republic of Korea.

<sup>f</sup> Department of Chemistry and Department of Energy Engineering, Ulsan National Institute of Science and Technology (UNIST), Ulsan 689-798, Republic of Korea

<sup>g</sup> Department of Chemistry, University of Texas at Austin, Austin, Texas, 78712, USA.

\*E-mail: [jarambula@georgiasouthern.edu](mailto:jarambula@georgiasouthern.edu); [kuppuswamy.arumugam@wright.edu](mailto:kuppuswamy.arumugam@wright.edu)

### Table of Contents

|                                                                 |         |
|-----------------------------------------------------------------|---------|
| <b>Synthesis</b>                                                | S2-S2   |
| <b>X-ray Crystallography</b>                                    | S2-S2   |
| <b>Electrochemical Data</b>                                     | S3-S4   |
| <b><sup>1</sup>H and <sup>13</sup>C NMR Spectra</b>             | S5-S10  |
| <b>UV-Vis Absorption Spectra</b>                                | S11-S11 |
| <b>Biological Assays</b>                                        | S12-S13 |
| <b>RNA Microarray Heat Map and Differential Gene Expression</b> | S14-S26 |
| <b>References</b>                                               | S26-S26 |

## Synthesis

An 8 mL screw cap vial equipped with a stir bar was charged with compound **5** (40 mg, 0.039 mmol) and AgBF<sub>4</sub> (5.5 mg, 0.084 mmol). Dry CH<sub>2</sub>Cl<sub>2</sub> was added to the vial and the resulting mixture was stirred at 25 °C for 4 h. During this time the bright yellow solution turned to a dark green solution, indicative of formation of ferrocenium species. At the end of 4 h stir, the reaction mixture was filtered through a plug of Celite into a 8 mL vial. The volatiles were removed under reduced pressure and the resulting crude product was washed with 3 × 2 mL Et<sub>2</sub>O. The resulting product was dried under reduced pressure to yield a dark green solid. Yield: 83%. Refer **Figure S13** for electronic spectra.

**Table S1.** Crystallographic and refinement data.

|                              | Compound <b>5</b>                                                                               | Compound <b>6</b>                                                                              |
|------------------------------|-------------------------------------------------------------------------------------------------|------------------------------------------------------------------------------------------------|
| CCDC                         | 1419940                                                                                         | 1419941                                                                                        |
| solvent                      | CH <sub>2</sub> Cl <sub>2</sub>                                                                 | none                                                                                           |
| formula                      | C <sub>94</sub> H <sub>100</sub> N <sub>8</sub> Au <sub>2</sub> Fe <sub>4</sub> Cl <sub>6</sub> | C <sub>100</sub> H <sub>96</sub> N <sub>8</sub> Au <sub>2</sub> Fe <sub>8</sub> I <sub>2</sub> |
| fw                           | 2171.85                                                                                         | 1252.2                                                                                         |
| xtl system                   | monoclinic                                                                                      | triclinic                                                                                      |
| space grp                    | C2/c                                                                                            | P-1                                                                                            |
| color, habit                 | yellow, block                                                                                   | yellow, block                                                                                  |
| <i>a</i> , Å                 | 27.578(1)                                                                                       | 12.387(2)                                                                                      |
| <i>b</i> , Å                 | 11.919(1)                                                                                       | 12.624(2)                                                                                      |
| <i>c</i> , Å                 | 27.111(1)                                                                                       | 15.234(3)                                                                                      |
| <i>α</i> , deg.              | 90.00                                                                                           | 90.566(5)                                                                                      |
| <i>β</i> , deg.              | 95.0850(8)                                                                                      | 98.317(4)                                                                                      |
| <i>γ</i> , deg.              | 90.00                                                                                           | 114.321(4)                                                                                     |
| <i>V</i> , Å <sup>3</sup>    | 8876.55(42)                                                                                     | 2138.99(60)                                                                                    |
| T, K                         | 100(2)                                                                                          | 100(2)                                                                                         |
| Z                            | 4                                                                                               | 2                                                                                              |
| R1, wR2 <sup>a</sup>         | 0.049, 0.129                                                                                    | 0.064, 0.183                                                                                   |
| GoF on <i>F</i> <sup>2</sup> | 1.204                                                                                           | 1.049                                                                                          |

$$^a R1 = \frac{\sum ||F_o| - |F_c||}{\sum |F_o|}. \quad ^b R_w = \frac{\{\sum w(F_o^2 - F_c^2)^2\}^{1/2}}{\sum w(F_o^2)^2}; \quad w = 1/[\sigma^2(F_o^2) + (xP)^2], \quad \text{where } P = (F_o^2 + 2F_c^2)/3.$$

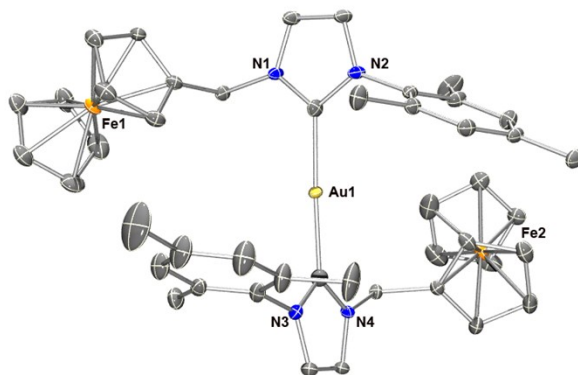

**Figure S1.** ORTEP diagram of Compound **5** rendered using POV-Ray. Thermal ellipsoid plots are drawn at the 50% probability level. Hydrogen atoms and counter anion are omitted for clarity. Selected bond lengths (Å) and angles (deg): C1–N1, 1.346(9); C1–N2, 1.353(9); C1–Au1, 2.000(7); C24–Au1, 2.023(6); C24–N3, 1.346(8), C24–N4, 1.339(8); N1–C1–N2, 104.6(6), N3–C24–N4, 105.8(5); C1–Au1–C24, 177.1(3).

## Electrochemistry

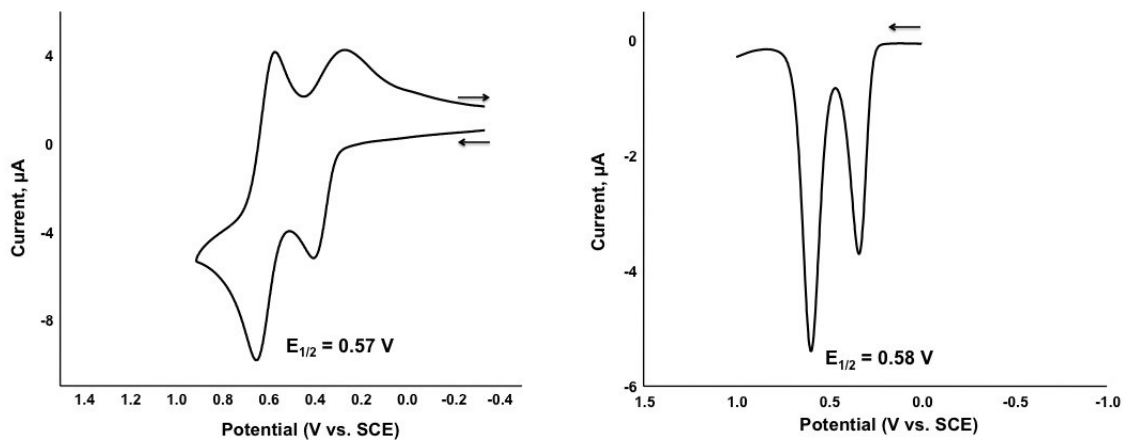

**Figure S2.** CV ( $100\text{ mV s}^{-1}$  scan rate) and DPV ( $50\text{ mV}$  pulse amplitude) of compound **2** in DMSO ( $1\text{ mM}$ ) and  $0.1\text{ M [N}(n\text{Bu}_4)\text{]}^+\text{[PF}_6\text{]}^-$  as referenced to decamethylferrocene ( $\text{Fc}^*$ ) (internal standard, adjusted to  $-0.030\text{ V vs. SCE}$ ).<sup>1</sup>

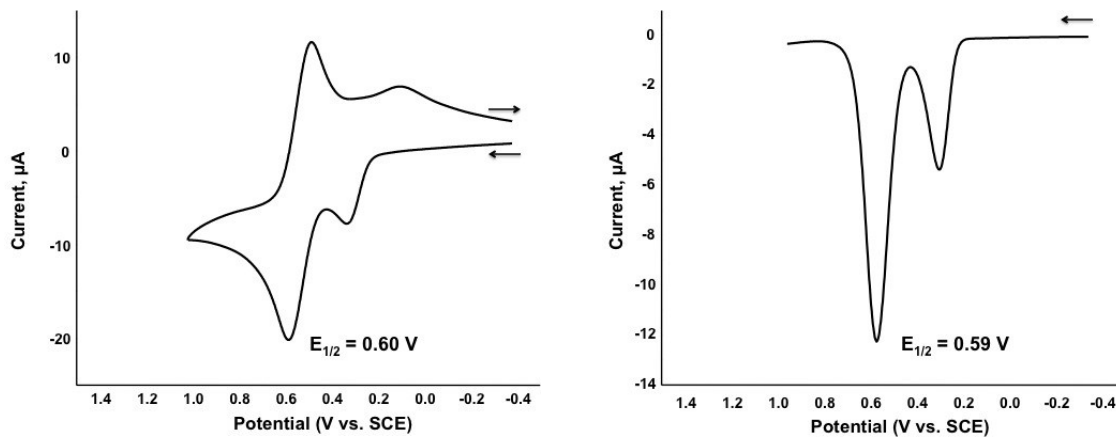

**Figure S3.** CV ( $100\text{ mV s}^{-1}$  scan rate) and DPV ( $50\text{ mV}$  pulse amplitude) of compound **3** in DMSO ( $1\text{ mM}$ ) and  $0.1\text{ M [N}(n\text{Bu}_4)\text{]}^+\text{[PF}_6\text{]}^-$  as referenced to decamethylferrocene ( $\text{Fc}^*$ ) (internal standard, adjusted to  $-0.030\text{ V vs. SCE}$ ).<sup>1</sup>

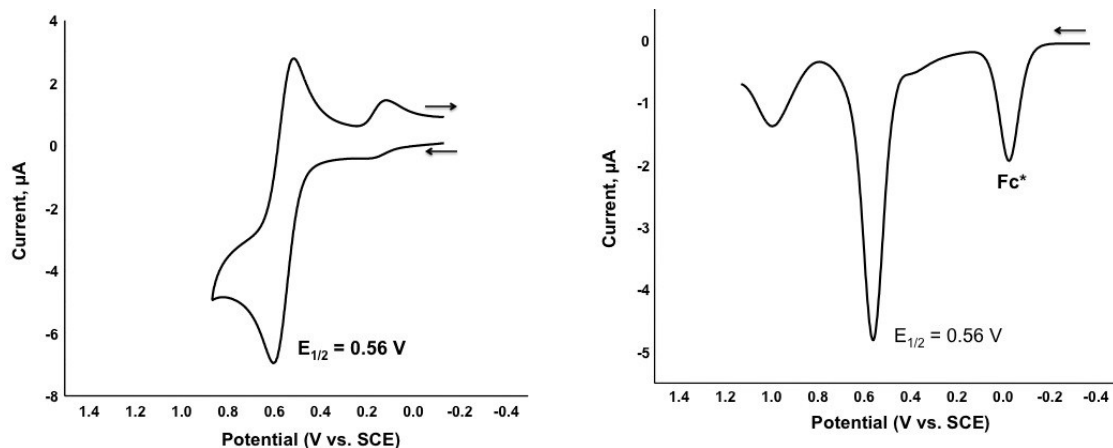

**Figure S4.** CV ( $100 \text{ mV s}^{-1}$  scan rate) and DPV (50 mV pulse amplitude) of compound **5** in DMSO (1 mM) and 0.1 M  $[\text{N}(\textit{n}\text{Bu}_4)]^+[\text{PF}_6]^-$  as referenced to decamethylferrocene ( $\text{Fc}^*$ ) (internal standard, adjusted to  $-0.030 \text{ V vs. SCE}$ ).<sup>1</sup>

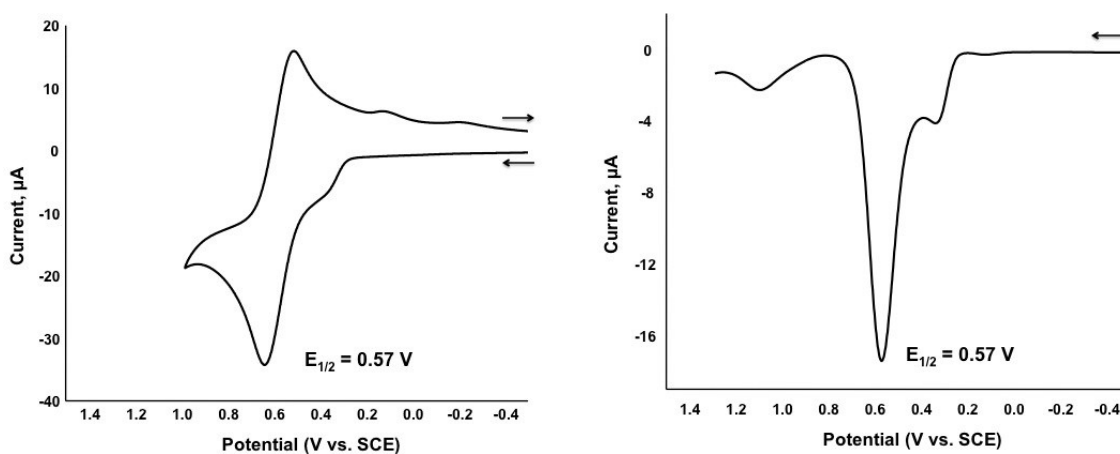

**Figure S5.** CV ( $100 \text{ mV s}^{-1}$  scan rate) and DPV (50 mV pulse amplitude) of compound **6** in DMSO (1 mM) and 0.1 M  $[\text{N}(\textit{n}\text{Bu}_4)]^+[\text{PF}_6]^-$  as referenced to decamethylferrocene ( $\text{Fc}^*$ ) (internal standard, adjusted to  $-0.030 \text{ V vs. SCE}$ ).<sup>1</sup>

# $^1\text{H}$ and $^{13}\text{C}$ NMR Spectra

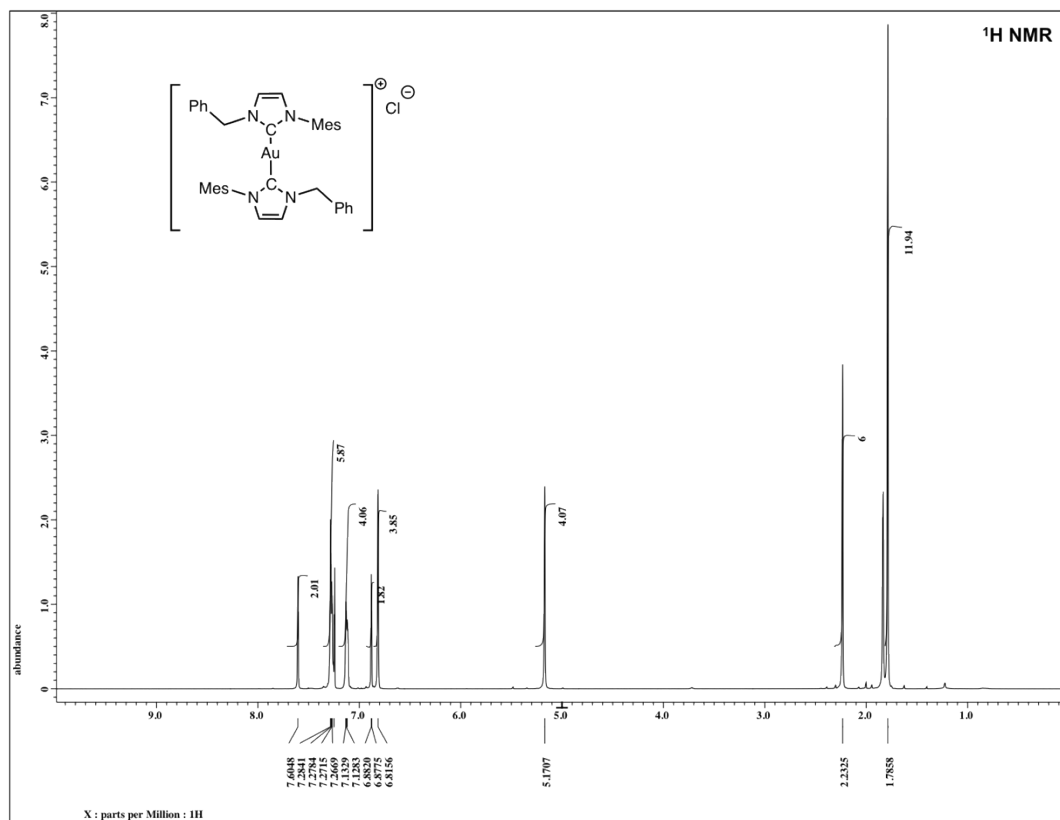

**Figure S6.**  $^1\text{H}$  NMR spectrum of compound 4.

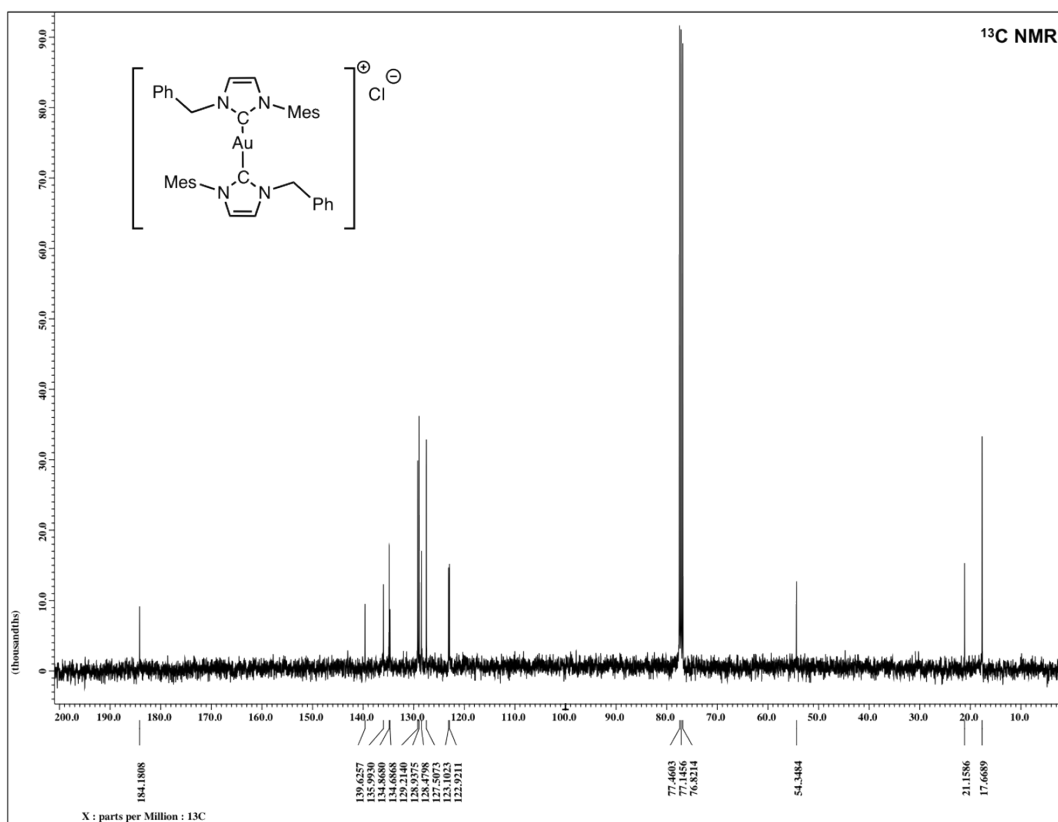

**Figure S7.** <sup>13</sup>C NMR spectrum of compound **4**.

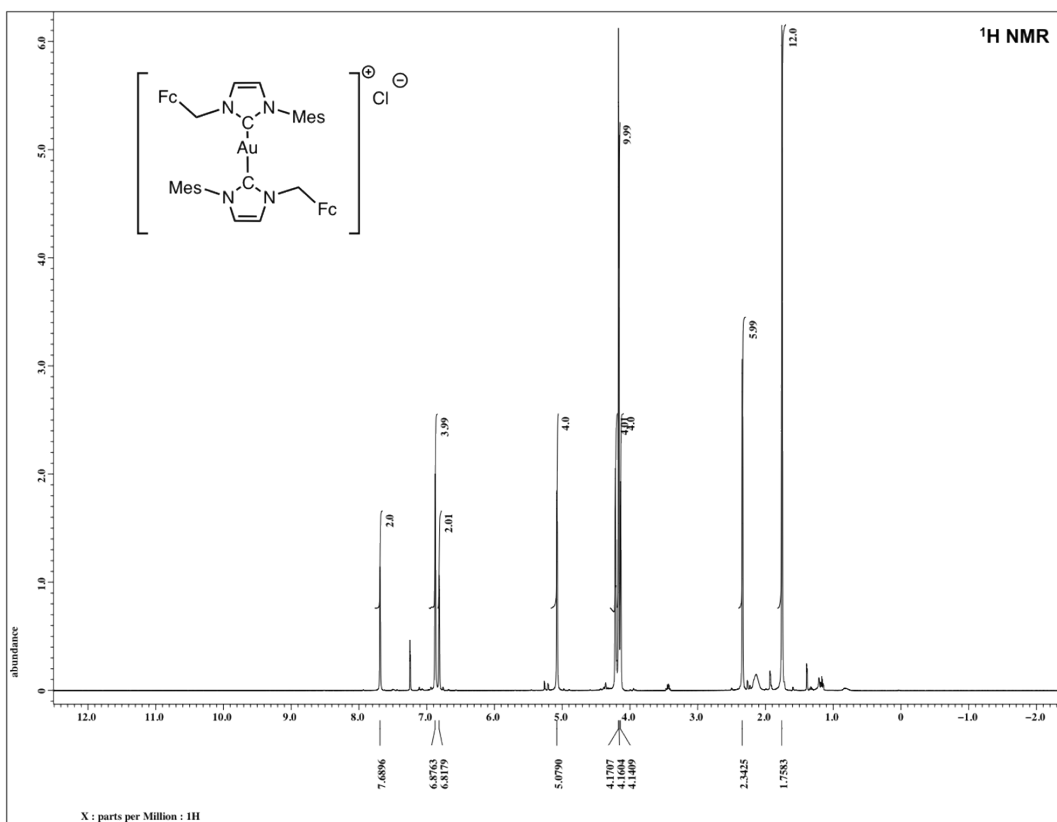

**Figure S8.** <sup>1</sup>H NMR spectrum of compound 5.





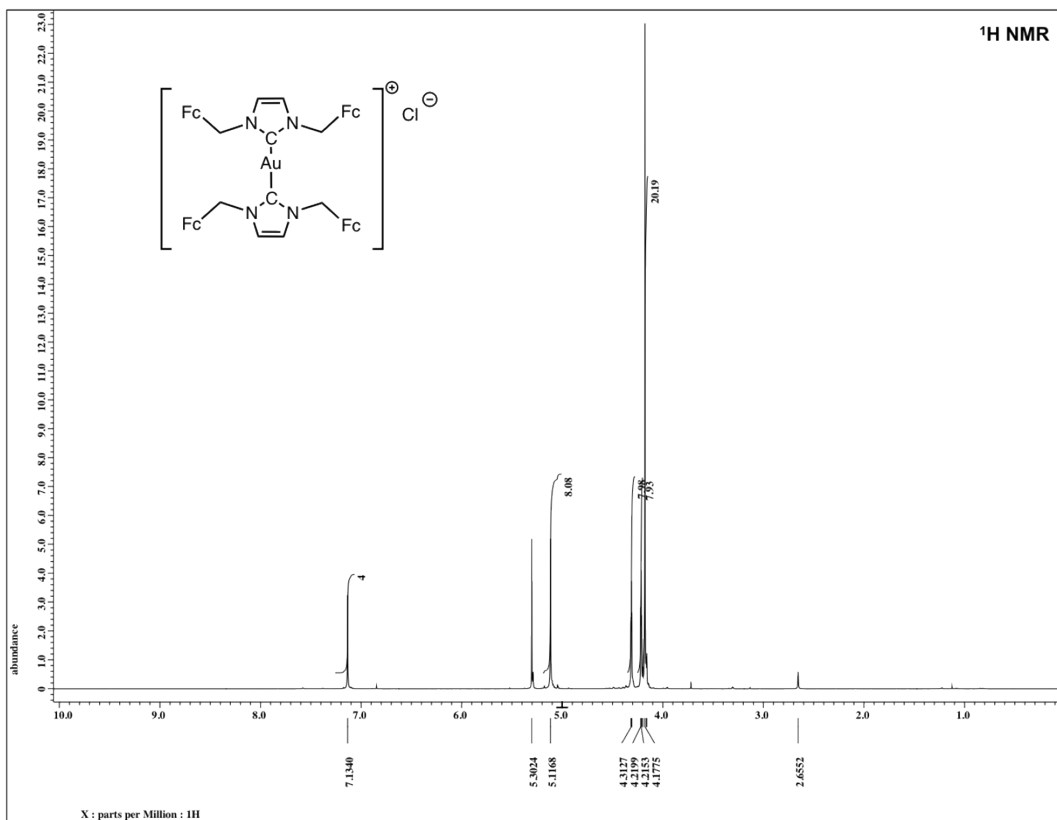

**Figure S10.** <sup>1</sup>H NMR spectrum of compound 6.

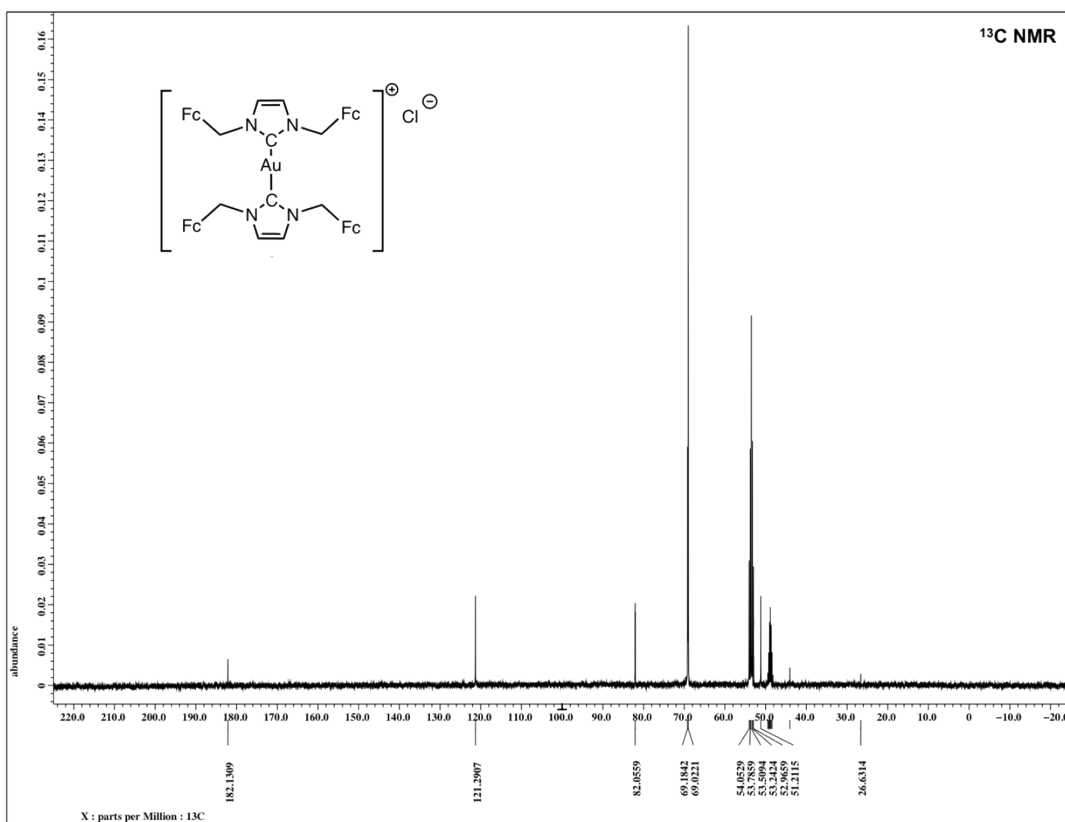

Figure S11. <sup>13</sup>C NMR spectrum of compound **6**.

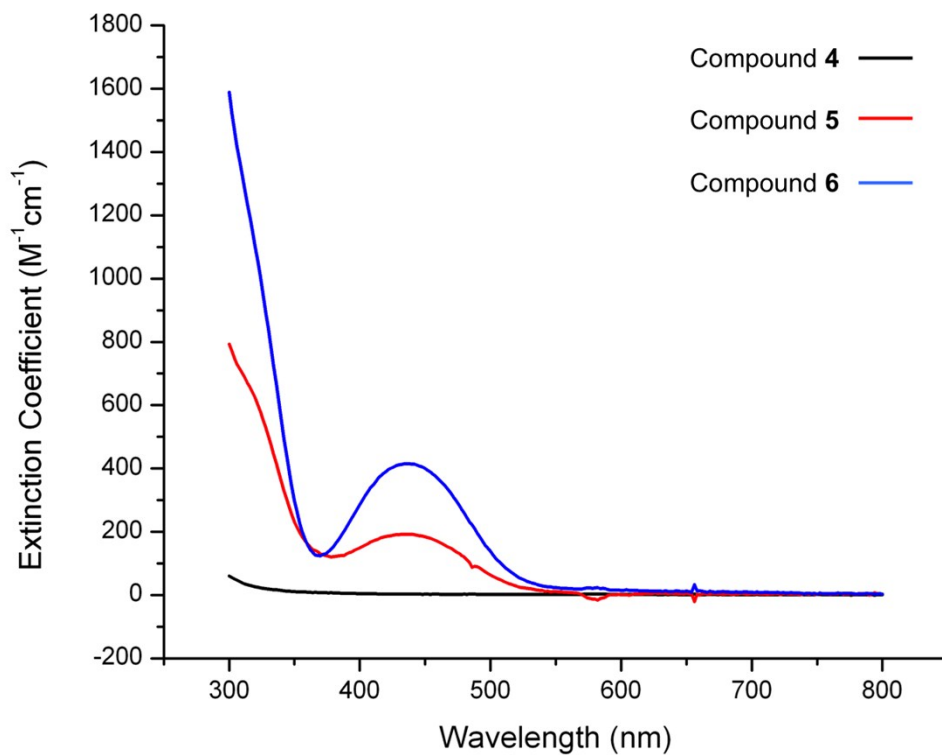

**Figure S12.** Electronic absorption spectra of compounds **4**, **5**, and **6** recorded in  $\text{CH}_2\text{Cl}_2$  at  $25\text{ }^\circ\text{C}$ .

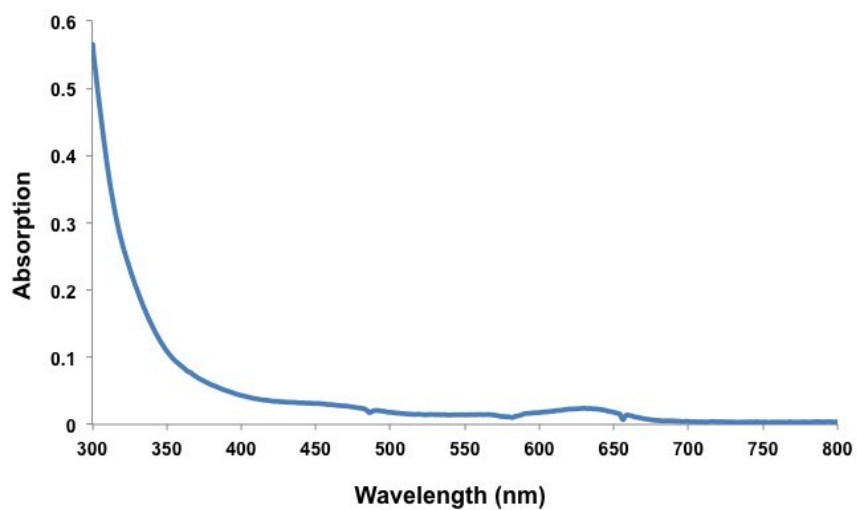

**Figure S13.** Electronic absorption spectra of compound **5** $[\text{BF}_4]_2$ , recorded in  $\text{CH}_2\text{Cl}_2$  at  $25\text{ }^\circ\text{C}$ .

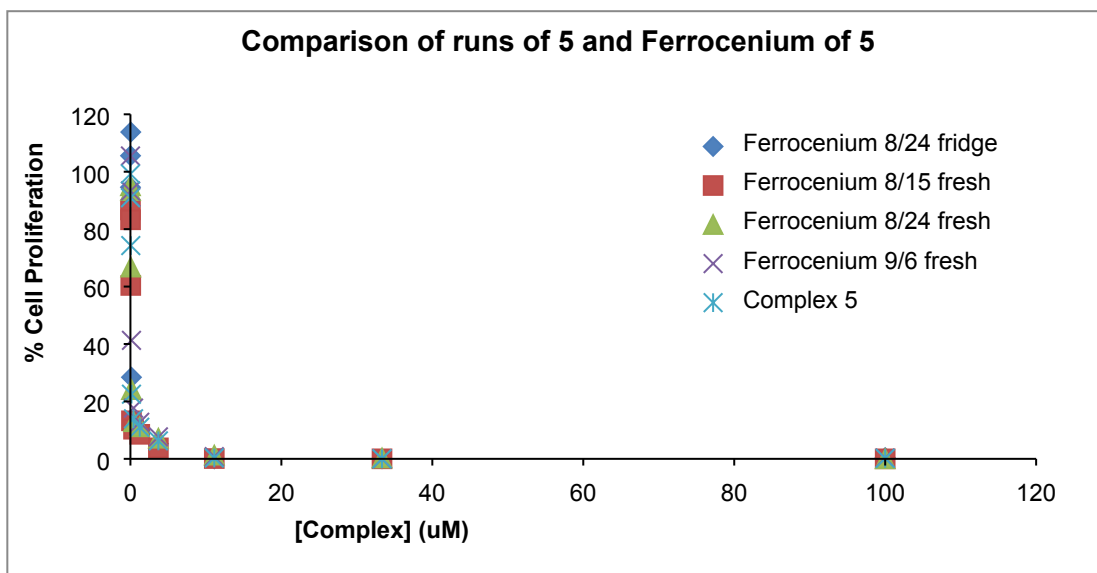

**Figure S14.** Cell proliferation study of ferrocene complex **5** and ferrocenium complex (**5**)[BF<sub>4</sub>]<sub>2</sub>) with A549 lung cancer cells. As discussed in the main text, this study was taken as evidence that there is little to no observed cytotoxicity difference between complex **5** and its oxidized form.

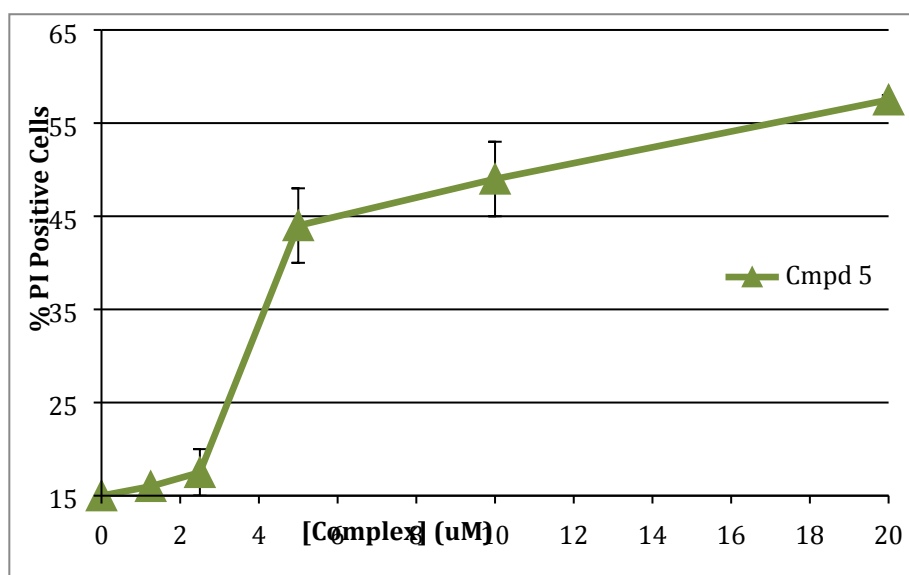

**Figure S15.** Positive propidium iodide (PI) signal from live A549 cells exposed to complex **5** for 4 hours. This graph illustrates the threshold of complex exposure allowed to study cellular function without stressing/killing cells.

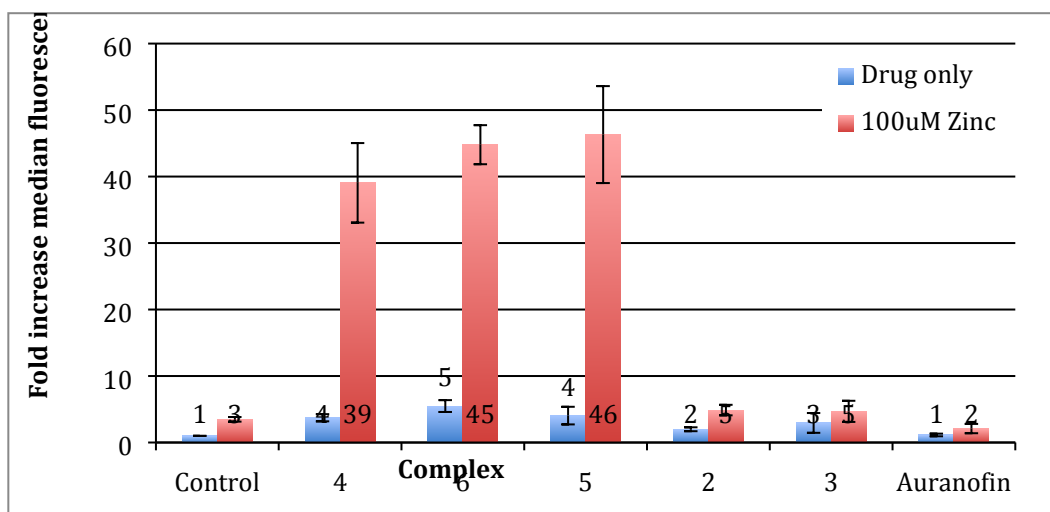

**Figure S16.** Difference (plotted as the fold increase) in fluorescence emission intensity as detected by flow cytometry of live A549 cells treated with 2.5  $\mu\text{M}$  of complex **6** (blue) and 2.5  $\mu\text{M}$  of complex **6** in the presence of 100  $\mu\text{M}$  zinc acetate.

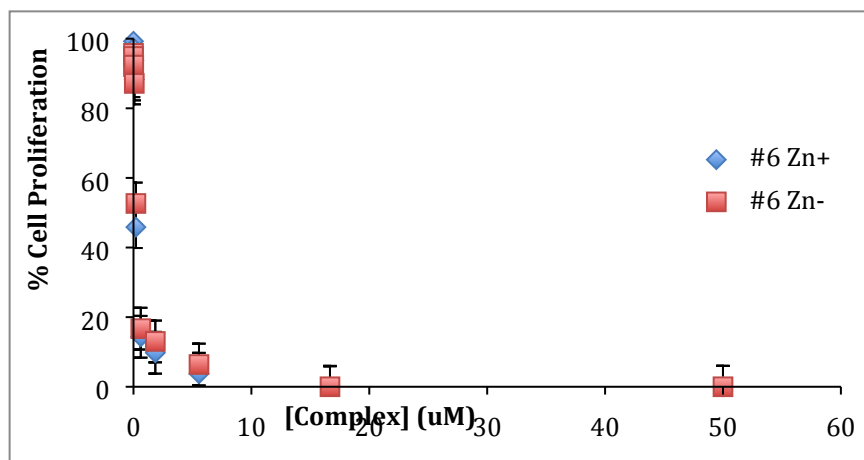

| Compound(s)   | IC50 value | standard deviation of IC50 value |
|---------------|------------|----------------------------------|
| <b>6</b>      | 0.1593083  | 0.04271                          |
| <b>6 + Zn</b> | 0.127415   | 0.051826                         |

**Figure S17.** Cell proliferation study in A549 lung cancer cells comparing the activity of complex **6** vs. complex **6** in the presence of 100  $\mu\text{M}$  zinc acetate.

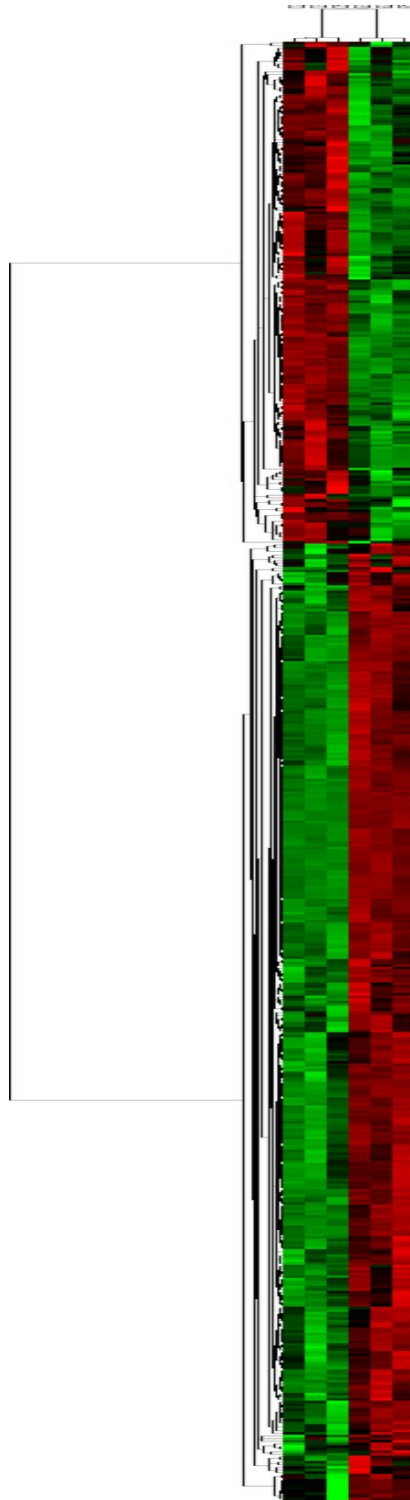

**Figure S18.** RNA microarray heat map illustrating differential gene expression of RNA transcripts in A549 lung cancer cells treated with vehicle (left panel) and complex **6** (right panel).

**Table S2.** Differential gene expression in A549 lung cancer cells treated with complex 6.

| Gene ID | Gene symbol | Gene Description                                                                                                                                        | FC   | P-value     |
|---------|-------------|---------------------------------------------------------------------------------------------------------------------------------------------------------|------|-------------|
| 79094   | CHAC1       | ChaC, cation transport regulator homolog 1                                                                                                              | 5.56 | 1.19205E-07 |
| 1649    | DDIT3       | DNA-damage-inducible transcript 3                                                                                                                       | 4.43 | 4.30297E-09 |
| 57761   | TRIB3       | tribbles pseudokinase 3 (TRIB3)                                                                                                                         | 4.41 | 6.5417E-08  |
| 440     | ASNS        | asparagine synthetase (glutamine-hydrolyzing)                                                                                                           | 3.94 | 3.28201E-08 |
| 27063   | ANKRD1      | ankyrin repeat domain 1 (cardiac muscle)                                                                                                                | 3.90 | 0.000102275 |
| 8614    | STC2        | stanniocalcin 2                                                                                                                                         | 3.54 | 1.49565E-06 |
| 116496  | FAM129A     | family with sequence similarity 129, member A                                                                                                           | 3.19 | 0.000205081 |
| 83667   | SESN2       | sestrin 2                                                                                                                                               | 3.10 | 1.87328E-07 |
| 29968   | PSAT1       | phosphoserine aminotransferase 1                                                                                                                        | 2.96 | 4.0621E-07  |
| 80329   | ULBP1       | UL16 binding protein 1                                                                                                                                  | 2.96 | 1.36486E-07 |
| 9518    | GDF15       | growth differentiation factor 15                                                                                                                        | 2.90 | 9.19533E-06 |
| 286343  | LURAP1L     | Homo sapiens leucine rich adaptor protein 1-like (LURAP1L), mRNA.                                                                                       | 2.88 | 5.78279E-08 |
| 7779    | SLC30A1     | solute carrier family 30 (zinc transporter)                                                                                                             | 2.86 | 0.002992119 |
| 23645   | PPP1R15A    | protein phosphatase 1, regulatory subunit 15A                                                                                                           | 2.79 | 7.03697E-07 |
| 80201   | HKDC1       | Homo sapiens hexokinase domain containing 1 (HKDC1), mRNA.                                                                                              | 2.68 | 8.21795E-07 |
| 10797   | MTHFD2      | Homo sapiens methylenetetrahydrofolate dehydrogenase (NADP+ dependent) 2, methenyltetrahydrofolate cyclohydrolase (MTHFD2), transcript variant 1, mRNA. | 2.65 | 9.252E-08   |
| 7436    | VLDLR       | very low density lipoprotein receptor                                                                                                                   | 2.56 | 3.7443E-06  |
| 26227   | PHGDH       | Homo sapiens phosphoglycerate dehydrogenase (PHGDH), mRNA.                                                                                              | 2.53 | 1.76306E-06 |
| 4783    | NFIL3       | Homo sapiens nuclear factor, interleukin 3 regulated (NFIL3), transcript variant 3, mRNA.                                                               | 2.52 | 2.14704E-05 |
| 9709    | HERPUD1     | homocysteine-inducible, endoplasmic reticulum stress-inducible, ubiquitin-like domain                                                                   | 2.48 | 2.53382E-07 |
| 2081    | ERN1        | endoplasmic reticulum to nucleus signaling 1                                                                                                            | 2.44 | 1.02427E-06 |
| 3162    | HMOX1       | heme oxygenase (decycling) 1                                                                                                                            | 2.41 | 6.63288E-05 |
| 6509    | SLC1A4      | Homo sapiens solute carrier family 1 (glutamate/neutral amino acid transporter), member 4 (SLC1A4), transcript variant 2, mRNA.                         | 2.30 | 1.48838E-06 |
| 2617    | GARS        | Homo sapiens glycyl-tRNA synthetase (GARS), mRNA.                                                                                                       | 2.27 | 1.23327E-06 |
| 162394  | SLFN5       | Homo sapiens schlafen family member 5 (SLFN5), mRNA.                                                                                                    | 2.26 | 2.68813E-05 |
| 80763   | SPX         | Homo sapiens spexin hormone (SPX), mRNA.                                                                                                                | 2.26 | 0.002437248 |
| 4495    | MT1G        | metallothionein 1G                                                                                                                                      | 2.24 | 0.034444693 |
| 833     | CARS        | Homo sapiens cysteinyl-tRNA synthetase (CARS), transcript variant 3, mRNA.                                                                              | 2.22 | 2.65564E-07 |
| 84962   | AJUBA       | Homo sapiens ajuba LIM protein (AJUBA), transcript variant 1, mRNA.                                                                                     | 2.15 | 1.47549E-05 |

|        |         |                                                                                                                |      |             |
|--------|---------|----------------------------------------------------------------------------------------------------------------|------|-------------|
| 6541   | SLC7A1  | Homo sapiens solute carrier family 7 (cationic amino acid transporter, y+ system), member 1 (SLC7A1), mRNA.    | 2.15 | 6.79224E-06 |
| 54206  | ERRFI1  | Homo sapiens ERBB receptor feedback inhibitor 1 (ERRFI1), mRNA.                                                | 2.10 | 2.43721E-05 |
| 467    | ATF3    | activating transcription factor 3                                                                              | 2.10 | 1.231E-06   |
| 163732 | CITED4  | Homo sapiens Cbp/p300-interacting transactivator, with Glu/Asp-rich carboxy-terminal domain, 4 (CITED4), mRNA. | 2.07 | 2.95107E-05 |
| 80008  | TMEM156 | Homo sapiens transmembrane protein 156 (TMEM156), mRNA.                                                        | 2.06 | 0.001612019 |
| 1847   | DUSP5   | Homo sapiens dual specificity phosphatase 5 (DUSP5), mRNA.                                                     | 2.04 | 8.75262E-06 |
| 54407  | SLC38A2 | Homo sapiens solute carrier family 38, member 2 (SLC38A2), mRNA.                                               | 2.04 | 0.001170623 |
| 2805   | GOT1    | Homo sapiens glutamic-oxaloacetic transaminase 1, soluble (GOT1), mRNA.                                        | 2.04 | 7.7059E-06  |
| 160428 | ALDH1L2 | Homo sapiens aldehyde dehydrogenase 1 family, member L2 (ALDH1L2), transcript variant 1, mRNA.                 | 2.04 | 4.25667E-06 |
| 16     | AARS    | alanyl-tRNA synthetase                                                                                         | 2.03 | 3.39778E-06 |
| 26136  | TES     | Homo sapiens testis derived transcript (3 LIM domains) (TES), transcript variant 1, mRNA.                      | 2.02 | 1.71774E-06 |
| 116442 | RAB39B  | Homo sapiens RAB39B, member RAS oncogene family (RAB39B), mRNA.                                                | 2.02 | 0.002026708 |
| 9242   | MSC     | Homo sapiens musculin (MSC), mRNA.                                                                             | 2.02 | 3.42236E-05 |
| 255394 | TCP11L2 | Homo sapiens t-complex 11, testis-specific-like 2 (TCP11L2), transcript variant 1, mRNA.                       | 2.02 | 1.95713E-05 |
| 586    | BCAT1   | Homo sapiens branched chain amino-acid transaminase 1, cytosolic (BCAT1), transcript variant 2, mRNA.          | 2.01 | 7.50148E-05 |
| 1647   | GADD45A | Homo sapiens growth arrest and DNA-damage-inducible, alpha (GADD45A), transcript variant 2, mRNA.              | 2.00 | 3.37849E-05 |
| 5106   | PCK2    | Homo sapiens phosphoenolpyruvate carboxykinase 2 (mitochondrial) (PCK2), transcript variant 2, mRNA.           | 1.99 | 1.61087E-06 |
| 133746 | JMY     | Homo sapiens junction mediating and regulatory protein, p53 cofactor (JMY), mRNA.                              | 1.98 | 3.0881E-05  |
| 51175  | TUBE1   | Homo sapiens tubulin, epsilon 1 (TUBE1), mRNA.                                                                 | 1.98 | 1.08676E-05 |
| 54541  | DDIT4   | Homo sapiens DNA-damage-inducible transcript 4 (DDIT4), mRNA.                                                  | 1.97 | 2.99663E-06 |
| 1106   | CHD2    | Homo sapiens chromodomain helicase DNA binding protein 2 (CHD2), transcript variant 2, mRNA.                   | 1.95 | 8.22031E-05 |
| 2113   | ETS1    | Homo sapiens v-ets avian erythroblastosis virus E26 oncogene homolog 1 (ETS1), transcript variant 1, mRNA.     | 1.93 | 0.0002419   |
| 6301   | SARS    | Homo sapiens seryl-tRNA synthetase (SARS),                                                                     | 1.93 | 5.4855E-06  |



|        |          |                                                                                                                       |      |             |
|--------|----------|-----------------------------------------------------------------------------------------------------------------------|------|-------------|
|        |          | transcript variant 1, mRNA.                                                                                           |      |             |
| 2920   | CXCL2    | chemokine (C-X-C motif) ligand 2                                                                                      | 1.93 | 0.00014337  |
| 4490   | MT1B     | metallothionein 1B                                                                                                    | 1.92 | 0.032952383 |
| 3576   | CXCL8    | chemokine (C-X-C motif) ligand 8                                                                                      | 1.92 | 1.10178E-05 |
| 145788 | C15orf65 | Homo sapiens chromosome 15 open reading frame 65 (C15orf65), mRNA.                                                    | 1.87 | 0.000210808 |
| 7494   | XBP1     | X-box binding protein 1                                                                                               | 1.87 | 3.60972E-05 |
| 4141   | MARS     | Homo sapiens methionyl-tRNA synthetase (MARS), mRNA.                                                                  | 1.87 | 6.87998E-06 |
| 84706  | GPT2     | Homo sapiens glutamic pyruvate transaminase (alanine aminotransferase) 2 (GPT2), transcript variant 2, mRNA.          | 1.87 | 5.67834E-07 |
| 13     | AADAC    | Homo sapiens arylacetamide deacetylase (AADAC), mRNA.                                                                 | 1.86 | 1.27816E-05 |
| 1054   | CEBPG    | Homo sapiens CCAAT/enhancer binding protein (C/EBP), gamma (CEBPG), transcript variant 2, mRNA.                       | 1.85 | 6.39341E-06 |
| 8408   | ULK1     | Homo sapiens unc-51 like autophagy activating kinase 1 (ULK1), mRNA.                                                  | 1.84 | 9.42012E-06 |
| 330    | BIRC3    | Homo sapiens baculoviral IAP repeat containing 3 (BIRC3), transcript variant 1, mRNA.                                 | 1.83 | 0.000914253 |
| 3656   | IRAK2    | Homo sapiens interleukin-1 receptor-associated kinase 2 (IRAK2), mRNA.                                                | 1.83 | 5.07967E-05 |
| 23135  | KDM6B    | Homo sapiens lysine (K)-specific demethylase 6B (KDM6B), mRNA.                                                        | 1.81 | 3.74662E-06 |
| 6510   | SLC1A5   | Homo sapiens solute carrier family 1 (neutral amino acid transporter), member 5 (SLC1A5), transcript variant 2, mRNA. | 1.79 | 8.18401E-06 |
| 25932  | CLIC4    | Homo sapiens chloride intracellular channel 4 (CLIC4), mRNA.                                                          | 1.78 | 1.9386E-05  |
| 81539  | SLC38A1  | Homo sapiens solute carrier family 38, member 1 (SLC38A1), transcript variant 2, mRNA.                                | 1.77 | 8.50814E-05 |
| 4496   | MT1H     | metallothionein 1H                                                                                                    | 1.77 | 0.025658976 |
| 5366   | PMAIP1   | Homo sapiens phorbol-12-myristate-13-acetate-induced protein 1 (PMAIP1), mRNA.                                        | 1.77 | 0.000860403 |
| 9076   | CLDN1    | Homo sapiens claudin 1 (CLDN1), mRNA.                                                                                 | 1.76 | 6.81326E-05 |
| 8565   | YARS     | Homo sapiens tyrosyl-tRNA synthetase (YARS), mRNA.                                                                    | 1.76 | 6.23673E-06 |
| 3352   | HTR1D    | Homo sapiens 5-hydroxytryptamine (serotonin) receptor 1D, G protein-coupled (HTR1D), mRNA.                            | 1.75 | 0.000321074 |
| 54887  | UHRF1BP1 | Homo sapiens UHRF1 binding protein 1 (UHRF1BP1), mRNA.                                                                | 1.75 | 1.26286E-06 |
| 54676  | GTPBP2   | Homo sapiens GTP binding protein 2 (GTPBP2), transcript variant 1, mRNA.                                              | 1.75 | 0.000103808 |
| 54557  | SGTB     | Homo sapiens small glutamine-rich tetratricopeptide                                                                   | 1.74 | 6.20701E-05 |

|        |           |                                                                                                                                                        |      |             |
|--------|-----------|--------------------------------------------------------------------------------------------------------------------------------------------------------|------|-------------|
|        |           | repeat (TPR)-containing, beta (SGTB), mRNA.                                                                                                            |      |             |
| 23710  | GABARAPL1 | Homo sapiens GABA(A) receptor-associated protein like 1 (GABARAPL1), mRNA.                                                                             | 1.74 | 6.12757E-06 |
| 51187  | RSL24D1   | Homo sapiens ribosomal L24 domain containing 1 (RSL24D1), mRNA.                                                                                        | 1.73 | 6.36195E-05 |
| 1503   | CTPS1     | Homo sapiens CTP synthase 1 (CTPS1), mRNA.                                                                                                             | 1.72 | 2.01453E-05 |
| 9258   | MFHAS1    | Homo sapiens malignant fibrous histiocytoma amplified sequence 1 (MFHAS1), mRNA.                                                                       | 1.71 | 2.23067E-05 |
| 390    | RND3      | Homo sapiens Rho family GTPase 3 (RND3), transcript variant 1, mRNA.                                                                                   | 1.70 | 5.84484E-06 |
| 11260  | XPOT      | Homo sapiens exportin, tRNA (XPOT), mRNA.                                                                                                              | 1.70 | 3.98803E-05 |
| 23327  | NEDD4L    | Homo sapiens neural precursor cell expressed, developmentally down-regulated 4-like, E3 ubiquitin protein ligase (NEDD4L), transcript variant b, mRNA. | 1.68 | 0.000190624 |
| 56892  | C8orf4    | Homo sapiens chromosome 8 open reading frame 4 (C8orf4), mRNA.                                                                                         | 1.68 | 0.001644041 |
| 8501   | SLC43A1   | Homo sapiens solute carrier family 43 (amino acid system L transporter), member 1 (SLC43A1), transcript variant 2, mRNA.                               | 1.67 | 0.000939908 |
| 2673   | GFPT1     | Homo sapiens glutamine--fructose-6-phosphate transaminase 1 (GFPT1), transcript variant 1, mRNA.                                                       | 1.66 | 0.000565131 |
| 3475   | IFRD1     | Homo sapiens interferon-related developmental regulator 1 (IFRD1), transcript variant 2, mRNA.                                                         | 1.66 | 3.09525E-06 |
| 1848   | DUSP6     | Homo sapiens dual specificity phosphatase 6 (DUSP6), transcript variant 1, mRNA.                                                                       | 1.66 | 4.87461E-06 |
| 201651 | AADACP1   | Homo sapiens arylacetamide deacetylase pseudogene 1 (AADACP1), non-coding RNA.                                                                         | 1.65 | 0.000543321 |
| 374    | AREG      | Homo sapiens amphiregulin (AREG), mRNA.                                                                                                                | 1.65 | 9.32866E-05 |
| 2119   | ETV5      | Homo sapiens ets variant 5 (ETV5), mRNA.                                                                                                               | 1.65 | 3.551E-06   |
| 9682   | KDM4A     | Homo sapiens lysine (K)-specific demethylase 4A (KDM4A), mRNA.                                                                                         | 1.65 | 4.3198E-05  |
| 91694  | LONRF1    | Homo sapiens LON peptidase N-terminal domain and ring finger 1 (LONRF1), mRNA.                                                                         | 1.64 | 1.75383E-05 |
| 143872 | ARHGAP42  | Homo sapiens Rho GTPase activating protein 42 (ARHGAP42), mRNA.                                                                                        | 1.64 | 0.001036134 |
| 55034  | MOCOS     | Homo sapiens molybdenum cofactor sulfurase (MOCOS), mRNA.                                                                                              | 1.63 | 0.000539505 |
| 3311   | HSPA7     | heat shock 70kDa protein 7                                                                                                                             | 1.63 | 0.008645638 |
| 1956   | EGFR      | Homo sapiens epidermal growth factor receptor (EGFR), transcript variant 1, mRNA.                                                                      | 1.63 | 0.000388801 |
| 54532  | USP53     | Homo sapiens ubiquitin specific peptidase 53 (USP53), mRNA.                                                                                            | 1.62 | 0.004710235 |
| 1843   | DUSP1     | Homo sapiens dual specificity phosphatase 1 (DUSP1), mRNA.                                                                                             | 1.61 | 5.83679E-05 |
| 56907  | SPIRE1    | Homo sapiens spire-type actin nucleation factor 1                                                                                                      | 1.61 | 6.33854E-06 |

|               |            |                                                                                                                              |      |             |
|---------------|------------|------------------------------------------------------------------------------------------------------------------------------|------|-------------|
|               |            | (SPIRE1), transcript variant 1, mRNA.                                                                                        |      |             |
| 10050665<br>8 | OCLN       | Homo sapiens occludin (OCLN), transcript variant 3, mRNA.                                                                    | 1.61 | 0.002171762 |
| 22822         | PHLDA1     | Homo sapiens pleckstrin homology-like domain, family A, member 1 (PHLDA1), mRNA.                                             | 1.61 | 0.000711201 |
| 81631         | MAP1LC3B   | Homo sapiens microtubule-associated protein 1 light chain 3 beta (MAP1LC3B), mRNA.                                           | 1.61 | 0.000163794 |
| 875           | CBS        | Homo sapiens cystathionine-beta-synthase (CBS), transcript variant 1, mRNA.                                                  | 1.61 | 0.000225763 |
| 9975          | NR1D2      | Homo sapiens nuclear receptor subfamily 1, group D, member 2 (NR1D2), transcript variant 2, mRNA.                            | 1.61 | 0.000226438 |
| 64283         | ARHGEF28   | Homo sapiens Rho guanine nucleotide exchange factor (GEF) 28 (ARHGEF28), transcript variant 1, mRNA.                         | 1.60 | 5.39283E-05 |
| 4084          | MXD1       | Homo sapiens MAX dimerization protein 1 (MXD1), transcript variant 2, mRNA.                                                  | 1.60 | 1.45459E-05 |
| 2069          | EREG       | Homo sapiens epiregulin (EREG), mRNA.                                                                                        | 1.60 | 0.001269116 |
| 468           | ATF4       | Homo sapiens activating transcription factor 4 (ATF4), transcript variant 1, mRNA.                                           | 1.59 | 2.85502E-05 |
| 59277         | NTN4       | Homo sapiens netrin 4 (NTN4), mRNA.                                                                                          | 1.59 | 0.000121864 |
| 5054          | SERPINE1   | Homo sapiens serpin peptidase inhibitor, clade E (nexin, plasminogen activator inhibitor type 1), member 1 (SERPINE1), mRNA. | 1.59 | 0.027882965 |
| 57522         | SRGAP1     | Homo sapiens SLIT-ROBO Rho GTPase activating protein 1 (SRGAP1), mRNA.                                                       | 1.59 | 0.001259494 |
| 3219          | HOXB9      | Homo sapiens homeobox B9 (HOXB9), mRNA.                                                                                      | 1.59 | 0.000868323 |
| 4335          | MNT        | Homo sapiens MAX network transcriptional repressor (MNT), mRNA.                                                              | 1.58 | 0.000126869 |
| 3673          | ITGA2      | Homo sapiens integrin, alpha 2 (CD49B, alpha 2 subunit of VLA-2 receptor) (ITGA2), transcript variant 1, mRNA.               | 1.58 | 0.001464622 |
| 51315         | KRCC1      | Homo sapiens lysine-rich coiled-coil 1 (KRCC1), mRNA.                                                                        | 1.58 | 0.002096546 |
| 9181          | ARHGEF2    | Homo sapiens Rho/Rac guanine nucleotide exchange factor (GEF) 2 (ARHGEF2), transcript variant 1, mRNA.                       | 1.58 | 7.81428E-05 |
| 8682          | PEA15      | Homo sapiens phosphoprotein enriched in astrocytes 15 (PEA15), transcript variant 2, mRNA.                                   | 1.58 | 2.52053E-05 |
| 10050717<br>8 | SLFNL1-AS1 | Homo sapiens SLFNL1 antisense RNA 1 (SLFNL1-AS1), long non-coding RNA.                                                       | 1.57 | 0.00098649  |
| 118460        | EXOSC6     | Homo sapiens exosome component 6 (EXOSC6), mRNA.                                                                             | 1.57 | 0.000125254 |
| 5074          | PAWR       | Homo sapiens PRKC, apoptosis, WT1, regulator (PAWR), mRNA.                                                                   | 1.57 | 0.00078233  |
| 26959         | HBP1       | Homo sapiens HMG-box transcription factor 1 (HBP1), transcript variant 1, mRNA.                                              | 1.57 | 0.000504964 |

|               |           |                                                                                                                              |      |             |
|---------------|-----------|------------------------------------------------------------------------------------------------------------------------------|------|-------------|
| 26471         | NUPR1     | Homo sapiens nuclear protein, transcriptional regulator, 1 (NUPR1), transcript variant 1, mRNA.                              | 1.57 | 0.00034291  |
| 80853         | KDM7A     | Homo sapiens lysine (K)-specific demethylase 7A (KDM7A), mRNA.                                                               | 1.56 | 3.48311E-05 |
| 8795          | TNFRSF10B | Homo sapiens tumor necrosis factor receptor superfamily, member 10b (TNFRSF10B), transcript variant 1, mRNA.                 | 1.56 | 1.19697E-05 |
| 7422          | VEGFA     | Homo sapiens vascular endothelial growth factor A (VEGFA), transcript variant 1, mRNA.                                       | 1.56 | 7.97779E-06 |
| 639           | PRDM1     | Homo sapiens PR domain containing 1, with ZNF domain (PRDM1), transcript variant 1, mRNA.                                    | 1.56 | 6.02793E-05 |
| 114880        | OSBPL6    | Homo sapiens oxysterol binding protein-like 6 (OSBPL6), transcript variant 3, mRNA.                                          | 1.56 | 0.001492447 |
| 6374          | CXCL5     | Homo sapiens chemokine (C-X-C motif) ligand 5 (CXCL5), mRNA.                                                                 | 1.56 | 0.000268505 |
| 54498         | SMOX      | Homo sapiens spermine oxidase (SMOX), transcript variant 1, mRNA.                                                            | 1.55 | 0.001642205 |
| 10042294<br>3 | MIR3189   | Homo sapiens microRNA 3189 (MIR3189), microRNA.                                                                              | 1.55 | 0.001025243 |
| 10468         | FST       | Homo sapiens follistatin (FST), transcript variant FST317, mRNA.                                                             | 1.55 | 1.5755E-05  |
| 2697          | GJA1      | Homo sapiens gap junction protein, alpha 1, 43kDa (GJA1), mRNA.                                                              | 1.55 | 0.000935992 |
| 80315         | CPEB4     | Homo sapiens cytoplasmic polyadenylation element binding protein 4 (CPEB4), mRNA.                                            | 1.55 | 0.000446575 |
| 10150         | MBNL2     | Homo sapiens muscleblind-like splicing regulator 2 (MBNL2), transcript variant 1, mRNA.                                      | 1.55 | 0.002781866 |
| 205860        | TRIML2    | Homo sapiens tripartite motif family-like 2 (TRIML2), mRNA.                                                                  | 1.54 | 0.000126615 |
| 6782          | HSPA13    | heat shock protein 70kDa family, member 13                                                                                   | 1.54 | 0.001471724 |
| 1490          | CTGF      | Homo sapiens connective tissue growth factor (CTGF), mRNA.                                                                   | 1.54 | 0.00160884  |
| 81788         | NUAK2     | Homo sapiens NUAK family, SNF1-like kinase, 2 (NUAK2), mRNA.                                                                 | 1.54 | 0.004031124 |
| 2887          | GRB10     | Homo sapiens growth factor receptor-bound protein 10 (GRB10), transcript variant 2, mRNA.                                    | 1.54 | 6.04107E-05 |
| 6536          | SLC6A9    | Homo sapiens solute carrier family 6 (neurotransmitter transporter, glycine), member 9 (SLC6A9), transcript variant 3, mRNA. | 1.53 | 4.48892E-05 |
| 1407          | CRY1      | Homo sapiens cryptochrome circadian clock 1 (CRY1), mRNA.                                                                    | 1.53 | 8.38714E-05 |
| 9853          | RUSC2     | Homo sapiens RUN and SH3 domain containing 2 (RUSC2), transcript variant 1, mRNA.                                            | 1.53 | 0.000732852 |
| 8780          | RIOK3     | Homo sapiens RIO kinase 3 (RIOK3), mRNA.                                                                                     | 1.53 | 0.001933866 |
| 3491          | CYR61     | Homo sapiens cysteine-rich, angiogenic inducer, 61 (CYR61), mRNA.                                                            | 1.53 | 0.012661708 |

|           |              |                                                                                                                      |      |             |
|-----------|--------------|----------------------------------------------------------------------------------------------------------------------|------|-------------|
| 4616      | GADD45B      | Homo sapiens growth arrest and DNA-damage-inducible, beta (GADD45B), mRNA.                                           | 1.53 | 0.001441005 |
| 6897      | TARS         | Homo sapiens threonyl-tRNA synthetase (TARS), transcript variant 1, mRNA.                                            | 1.52 | 7.61352E-05 |
| 6515      | SLC2A3       | Homo sapiens solute carrier family 2 (facilitated glucose transporter), member 3 (SLC2A3), mRNA.                     | 1.52 | 0.005525219 |
| 79836     | LONRF3       | Homo sapiens LON peptidase N-terminal domain and ring finger 3 (LONRF3), transcript variant 1, mRNA.                 | 1.51 | 0.000183789 |
| 3309      | HSPA5        | heat shock 70kDa protein 5 (glucose-regulated protein, 78kDa)                                                        | 1.51 | 2.83009E-05 |
| 407021    | MIR29A       | Homo sapiens microRNA 29a (MIR29A), microRNA.                                                                        | 1.51 | 0.000616807 |
| 100859930 | HEIH         | Homo sapiens hepatocellular carcinoma up-regulated EZH2-associated long non-coding RNA (HEIH), long non-coding RNA.  | 1.51 | 0.000176998 |
| 26511     | CHIC2        | Homo sapiens cysteine-rich hydrophobic domain 2 (CHIC2), mRNA.                                                       | 1.51 | 0.000607613 |
| 283991    | UBALD2       | Homo sapiens UBA-like domain containing 2 (UBALD2), mRNA.                                                            | 1.51 | 0.000335073 |
| 326343    | MT1DP        | Homo sapiens metallothionein 1D, pseudogene (MT1DP), transcript variant 1, non-coding RNA.                           | 1.50 | 0.03870575  |
| 2058      | EPRS         | Homo sapiens glutamyl-prolyl-tRNA synthetase (EPRS), mRNA.                                                           | 1.49 | 0.001311123 |
| 114915    | EPB41L4A-AS1 | Homo sapiens EPB41L4A antisense RNA 1 (EPB41L4A-AS1), long non-coding RNA.                                           | 1.49 | 0.00015942  |
| 1051      | CEBPB        | Homo sapiens CCAAT/enhancer binding protein (C/EBP), beta (CEBPB), transcript variant 1, mRNA.                       | 1.49 | 0.003739844 |
| 694       | BTG1         | Homo sapiens B-cell translocation gene 1, anti-proliferative (BTG1), mRNA.                                           | 1.48 | 0.00029834  |
| 80709     | AKNA         | Homo sapiens AT-hook transcription factor (AKNA), mRNA.                                                              | 1.48 | 0.000172609 |
| 4677      | NARS         | Homo sapiens asparaginyl-tRNA synthetase (NARS), mRNA.                                                               | 1.48 | 0.000213934 |
| 7453      | WARS         | Homo sapiens tryptophanyl-tRNA synthetase (WARS), transcript variant 1, mRNA.                                        | 1.48 | 0.000373972 |
| 4609      | MYC          | Homo sapiens v-myc avian myelocytomatosis viral oncogene homolog (MYC), mRNA.                                        | 1.48 | 9.19855E-05 |
| 283337    | ZNF740       | Homo sapiens zinc finger protein 740 (ZNF740), mRNA.                                                                 | 1.48 | 1.7541E-05  |
| 29948     | OSGIN1       | oxidative stress induced growth inhibitor 1                                                                          | 1.48 | 0.000144965 |
| 5743      | PTGS2        | Homo sapiens prostaglandin-endoperoxide synthase 2 (prostaglandin G/H synthase and cyclooxygenase) (PTGS2), mRNA.    | 1.48 | 0.010842375 |
| 25902     | MTHFD1L      | Homo sapiens methylenetetrahydrofolate dehydrogenase (NADP+ dependent) 1-like (MTHFD1L), transcript variant 1, mRNA. | 1.48 | 0.00021717  |
| 57820     | CCNB1IP1     | Homo sapiens cyclin B1 interacting protein 1, E3                                                                     | 1.48 | 5.26928E-05 |

|        |          |                                                                                                                       |      |             |
|--------|----------|-----------------------------------------------------------------------------------------------------------------------|------|-------------|
|        |          | ubiquitin protein ligase (CCNB1IP1), transcript variant 1, mRNA.                                                      |      |             |
| 5723   | PSPH     | Homo sapiens phosphoserine phosphatase (PSPH), mRNA.                                                                  | 1.47 | 0.000154642 |
| 54977  | SLC25A38 | Homo sapiens solute carrier family 25, member 38 (SLC25A38), mRNA.                                                    | 1.47 | 0.000552094 |
| 27250  | PDCD4    | Homo sapiens programmed cell death 4 (neoplastic transformation inhibitor) (PDCD4), transcript variant 3, mRNA.       | 1.47 | 0.001169422 |
| 55659  | ZNF416   | Homo sapiens zinc finger protein 416 (ZNF416), mRNA.                                                                  | 1.46 | 4.87738E-05 |
| 4864   | NPC1     | Homo sapiens Niemann-Pick disease, type C1 (NPC1), mRNA.                                                              | 1.46 | 0.00176907  |
| 84798  | C19orf48 | Homo sapiens chromosome 19 open reading frame 48 (C19orf48), transcript variant 1, mRNA.                              | 1.46 | 0.000619345 |
| 7975   | MAFK     | Homo sapiens v-maf avian musculoaponeurotic fibrosarcoma oncogene homolog K (MAFK), mRNA.                             | 1.46 | 2.55415E-05 |
| 571    | BACH1    | Homo sapiens BTB and CNC homology 1, basic leucine zipper transcription factor 1 (BACH1), transcript variant 2, mRNA. | 1.46 | 0.003056492 |
| 558    | AXL      | Homo sapiens AXL receptor tyrosine kinase (AXL), transcript variant 2, mRNA.                                          | 1.46 | 0.001316471 |
| 144402 | CPNE8    | Homo sapiens copine VIII (CPNE8), mRNA.                                                                               | 1.45 | 0.000104847 |
| 5271   | SERPINB8 | Homo sapiens serpin peptidase inhibitor, clade B (ovalbumin), member 8 (SERPINB8), transcript variant 3, mRNA.        | 1.45 | 9.79701E-05 |
| 1778   | DYNC1H1  | Homo sapiens dynein, cytoplasmic 1, heavy chain 1 (DYNC1H1), mRNA.                                                    | 1.45 | 0.001315251 |
| 7706   | TRIM25   | Homo sapiens tripartite motif containing 25 (TRIM25), mRNA.                                                           | 1.45 | 0.000473856 |
| 8535   | CBX4     | Homo sapiens chromobox homolog 4 (CBX4), mRNA.                                                                        | 1.45 | 0.000520384 |
| 3976   | LIF      | Homo sapiens leukemia inhibitory factor (LIF), transcript variant 1, mRNA.                                            | 1.45 | 0.00021215  |
| 55596  | ZCCHC8   | Homo sapiens zinc finger, CCHC domain containing 8 (ZCCHC8), mRNA.                                                    | 1.45 | 0.002333212 |
| 10469  | TIMM44   | Homo sapiens translocase of inner mitochondrial membrane 44 homolog (yeast) (TIMM44), mRNA.                           | 1.45 | 2.8389E-05  |
| 96459  | FNIP1    | Homo sapiens folliculin interacting protein 1 (FNIP1), transcript variant 2, mRNA.                                    | 1.44 | 0.001006678 |
| 8061   | FOSL1    | Homo sapiens FOS-like antigen 1 (FOSL1), mRNA.                                                                        | 1.44 | 0.001483349 |
| 9411   | ARHGAP29 | Homo sapiens Rho GTPase activating protein 29 (ARHGAP29), mRNA.                                                       | 1.44 | 0.002264516 |
| 63874  | ABHD4    | Homo sapiens abhydrolase domain containing 4 (ABHD4), mRNA.                                                           | 1.44 | 0.00011778  |
| 9590   | AKAP12   | Homo sapiens A kinase (PRKA) anchor protein 12 (AKAP12), transcript variant 1, mRNA.                                  | 1.44 | 0.005606399 |

|               |             |                                                                                                                                         |      |             |
|---------------|-------------|-----------------------------------------------------------------------------------------------------------------------------------------|------|-------------|
| 1604          | CD55        | Homo sapiens CD55 molecule, decay accelerating factor for complement (Cromer blood group) (CD55), transcript variant 1, mRNA.           | 1.44 | 0.002217375 |
| 4498          | MT1JP       | Homo sapiens metallothionein 1J, pseudogene (MT1JP), non-coding RNA.                                                                    | 1.44 | 0.020411769 |
| 3376          | IARS        | Homo sapiens isoleucyl-tRNA synthetase (IARS), transcript variant 1, mRNA.                                                              | 1.44 | 4.26376E-05 |
| 6472          | SHMT2       | Homo sapiens serine hydroxymethyltransferase 2 (mitochondrial) (SHMT2), transcript variant 2, mRNA.                                     | 1.44 | 0.000183891 |
| 6868          | ADAM17      | Homo sapiens ADAM metalloproteinase domain 17 (ADAM17), mRNA.                                                                           | 1.44 | 0.000558432 |
| 10192946<br>7 | LURAP1L-AS1 | havana:known<br>chromosome:GRCh38:9:12700100:12814345:-1<br>gene:ENSG00000235448 gene_biotype:antisense<br>transcript_biotype:antisense | 1.44 | 0.001039004 |
| 148189        | LINC00662   | Homo sapiens long intergenic non-protein coding RNA 662 (LINC00662), long non-coding RNA.                                               | 1.43 | 0.002764419 |
| 8894          | EIF2S2      | Homo sapiens eukaryotic translation initiation factor 2, subunit 2 beta, 38kDa (EIF2S2), mRNA.                                          | 1.43 | 0.000618528 |
| 58526         | MID1IP1     | Homo sapiens MID1 interacting protein 1 (MID1IP1), transcript variant 2, mRNA.                                                          | 1.43 | 6.92004E-05 |
| 6617          | SNAPC1      | Homo sapiens small nuclear RNA activating complex, polypeptide 1, 43kDa (SNAPC1), mRNA.                                                 | 1.43 | 0.005124127 |
| 10193         | RNF41       | Homo sapiens ring finger protein 41, E3 ubiquitin protein ligase (RNF41), transcript variant 4, mRNA.                                   | 1.43 | 0.000232822 |
| 23345         | SYNE1       | Homo sapiens spectrin repeat containing, nuclear envelope 1 (SYNE1), transcript variant 2, mRNA.                                        | 1.43 | 0.000403164 |
| 4253          | CTAGE5      | Homo sapiens CTAGE family, member 5 (CTAGE5), transcript variant 5, mRNA.                                                               | 1.43 | 0.000636654 |
| 79745         | CLIP4       | Homo sapiens CAP-GLY domain containing linker protein family, member 4 (CLIP4), transcript variant 1, mRNA.                             | 1.43 | 5.91731E-05 |
| 60370         | AVPI1       | Homo sapiens arginine vasopressin-induced 1 (AVPI1), mRNA.                                                                              | 1.42 | 0.000221634 |
| 27            | ABL2        | Homo sapiens ABL proto-oncogene 2, non-receptor tyrosine kinase (ABL2), transcript variant d, mRNA.                                     | 1.42 | 0.00440369  |
| 190           | NR0B1       | Homo sapiens nuclear receptor subfamily 0, group B, member 1 (NR0B1), mRNA.                                                             | 1.42 | 0.00092319  |
| 169792        | GLIS3       | Homo sapiens GLIS family zinc finger 3 (GLIS3), transcript variant 1, mRNA.                                                             | 1.42 | 6.3173E-05  |
| 7693          | ZNF134      | Homo sapiens zinc finger protein 134 (ZNF134), mRNA.                                                                                    | 1.42 | 0.000554218 |
| 122553        | TRAPPC6B    | Homo sapiens trafficking protein particle complex 6B (TRAPPC6B), transcript variant 1, mRNA.                                            | 1.42 | 0.001304266 |
| 121268        | RHEBL1      | Homo sapiens Ras homolog enriched in brain like 1 (RHEBL1), mRNA.                                                                       | 1.42 | 0.000241942 |

|               |            |                                                                                                                                     |      |             |
|---------------|------------|-------------------------------------------------------------------------------------------------------------------------------------|------|-------------|
| 127544        | RNF19B     | Homo sapiens ring finger protein 19B (RNF19B), transcript variant 2, mRNA.                                                          | 1.41 | 0.00082868  |
| 10123         | ARL4C      | Homo sapiens ADP-ribosylation factor-like 4C (ARL4C), transcript variant 2, mRNA.                                                   | 0.71 | 6.77608E-05 |
| 6928          | HNF1B      | Homo sapiens HNF1 homeobox B (HNF1B), transcript variant 1, mRNA.                                                                   | 0.70 | 0.000841571 |
| 5209          | PFKFB3     | Homo sapiens 6-phosphofructo-2-kinase/fructose-2,6-biphosphatase 3 (PFKFB3), transcript variant 2, mRNA.                            | 0.70 | 0.000159423 |
| 64759         | TNS3       | Homo sapiens tensin 3 (TNS3), mRNA.                                                                                                 | 0.70 | 0.000143623 |
| 10137         | RBM12      | Homo sapiens RNA binding motif protein 12 (RBM12), transcript variant 3, mRNA.                                                      | 0.70 | 0.000166961 |
| 10110         | SGK2       | Homo sapiens serum/glucocorticoid regulated kinase 2 (SGK2), transcript variant 3, mRNA.                                            | 0.70 | 4.90732E-05 |
| 10050701<br>2 | BMPR1B-AS1 | havana:known<br>chromosome:GRCh38:4:94743800:94757533:-1<br>gene:ENSG00000249599 gene_biotype:lincRNA<br>transcript_biotype:lincRNA | 0.70 | 0.020454528 |
| 117246        | FTSJ3      | Homo sapiens FtsJ homolog 3 (E. coli) (FTSJ3), mRNA.                                                                                | 0.70 | 3.42647E-05 |
| 55388         | MCM10      | Homo sapiens minichromosome maintenance complex component 10 (MCM10), transcript variant 2, mRNA.                                   | 0.69 | 0.000307972 |
| 7903          | ST8SIA4    | Homo sapiens ST8 alpha-N-acetyl-neuraminide alpha-2,8-sialyltransferase 4 (ST8SIA4), transcript variant 1, mRNA.                    | 0.69 | 0.000394193 |
| 4998          | ORC1       | Homo sapiens origin recognition complex, subunit 1 (ORC1), transcript variant 2, mRNA.                                              | 0.69 | 0.000295964 |
| 9203          | ZMYM3      | Homo sapiens zinc finger, MYM-type 3 (ZMYM3), transcript variant 3, mRNA.                                                           | 0.69 | 0.001332034 |
| 3215          | HOXB5      | Homo sapiens homeobox B5 (HOXB5), mRNA.                                                                                             | 0.69 | 0.000438995 |
| 1031          | CDKN2C     | Homo sapiens cyclin-dependent kinase inhibitor 2C (p18, inhibits CDK4) (CDKN2C), transcript variant 1, mRNA.                        | 0.69 | 0.000542043 |
| 54443         | ANLN       | Homo sapiens anillin, actin binding protein (ANLN), transcript variant 1, mRNA.                                                     | 0.69 | 0.042628236 |
| 84951         | TNS4       | Homo sapiens tensin 4 (TNS4), mRNA.                                                                                                 | 0.69 | 0.007525507 |
| 729438        | GATSL2     | Homo sapiens GATS protein-like 2 (GATSL2), mRNA.                                                                                    | 0.69 | 4.79033E-05 |
| 388           | RHOB       | Homo sapiens ras homolog family member B (RHOB), mRNA.                                                                              | 0.68 | 0.013151504 |
| 23336         | SYNM       | Homo sapiens synemin, intermediate filament protein (SYNM), transcript variant B, mRNA.                                             | 0.68 | 0.000477282 |
| 91442         | C19orf40   | Homo sapiens chromosome 19 open reading frame 40 (C19orf40), mRNA.                                                                  | 0.68 | 0.000806062 |
| 1479          | CSTF3      | Homo sapiens cleavage stimulation factor, 3 pre-RNA, subunit 3, 77kDa (CSTF3), transcript variant 2, mRNA.                          | 0.68 | 0.00247835  |
| 6657          | SOX2       | Homo sapiens SRY (sex determining region Y)-box 2                                                                                   | 0.68 | 0.000708162 |



|               |           |                                                                                                   |      |             |
|---------------|-----------|---------------------------------------------------------------------------------------------------|------|-------------|
|               |           | (SOX2), mRNA.                                                                                     |      |             |
| 6821          | SUOX      | Homo sapiens sulfite oxidase (SUOX), transcript variant 1, mRNA.                                  | 0.68 | 7.52756E-05 |
| 23670         | TMEM2     | Homo sapiens transmembrane protein 2 (TMEM2), transcript variant 2, mRNA.                         | 0.67 | 0.000117566 |
| 26298         | EHF       | Homo sapiens ets homologous factor (EHF), transcript variant 3, mRNA.                             | 0.67 | 0.001355271 |
| 8335          | HIST1H2AB | Homo sapiens histone cluster 1, H2ab (HIST1H2AB), mRNA.                                           | 0.66 | 0.000909328 |
| 57561         | ARRDC3    | Homo sapiens arrestin domain containing 3 (ARRDC3), mRNA.                                         | 0.66 | 0.000235862 |
| 899           | CCNF      | Homo sapiens cyclin F (CCNF), mRNA.                                                               | 0.66 | 0.000909293 |
| 9075          | CLDN2     | Homo sapiens claudin 2 (CLDN2), transcript variant 2, mRNA.                                       | 0.66 | 0.001285849 |
| 374393        | FAM111B   | Homo sapiens family with sequence similarity 111, member B (FAM111B), transcript variant 2, mRNA. | 0.66 | 0.001260666 |
| 8346          | HIST1H2BI | Homo sapiens histone cluster 1, H2bi (HIST1H2BI), mRNA.                                           | 0.66 | 0.000358851 |
| 257629        | ANKS4B    | Homo sapiens ankyrin repeat and sterile alpha motif domain containing 4B (ANKS4B), mRNA.          | 0.65 | 0.011959771 |
| 406891        | MIRLET7I  | Homo sapiens microRNA let-7i (MIRLET7I), microRNA.                                                | 0.65 | 0.000402562 |
| 10012679<br>8 | SNAR-A1   | Homo sapiens small ILF3/NF90-associated RNA A1 (SNAR-A1), small nuclear RNA.                      | 0.64 | 0.001167124 |
| 9982          | FGFBP1    | Homo sapiens fibroblast growth factor binding protein 1 (FGFBP1), mRNA.                           | 0.64 | 0.001946405 |
| 1903          | S1PR3     | Homo sapiens sphingosine-1-phosphate receptor 3 (S1PR3), mRNA.                                    | 0.63 | 0.012657008 |
| 57181         | SLC39A10  | solute carrier family 39 (zinc transporter), member 10                                            | 0.63 | 0.016893383 |
| 10112         | KIF20A    | Homo sapiens kinesin family member 20A (KIF20A), mRNA.                                            | 0.61 | 0.003577463 |
| 283460        | HNF1A-AS1 | Homo sapiens HNF1A antisense RNA 1 (HNF1A-AS1), long non-coding RNA.                              | 0.61 | 0.000203855 |
| 10614         | HEXIM1    | Homo sapiens hexamethylene bis-acetamide inducible 1 (HEXIM1), mRNA.                              | 0.59 | 1.31185E-05 |
| 196410        | METTL7B   | Homo sapiens methyltransferase like 7B (METTL7B), mRNA.                                           | 0.58 | 0.000481523 |
| 23007         | PLCH1     | Homo sapiens phospholipase C, eta 1 (PLCH1), transcript variant 1, mRNA.                          | 0.58 | 0.000402872 |
| 56829         | ZC3HAV1   | Homo sapiens zinc finger CCCH-type, antiviral 1 (ZC3HAV1), transcript variant 1, mRNA.            | 0.57 | 5.75866E-06 |
| 3306          | HSPA2     | heat shock 70kDa protein 2                                                                        | 0.56 | 1.49155E-05 |
| 57622         | LRFN1     | Homo sapiens leucine rich repeat and fibronectin type III domain containing 1 (LRFN1), mRNA.      | 0.56 | 0.001525524 |
| 6662          | SOX9      | Homo sapiens SRY (sex determining region Y)-box 9 (SOX9), mRNA.                                   | 0.52 | 2.30174E-05 |

|               |         |                                                                                                                   |      |             |
|---------------|---------|-------------------------------------------------------------------------------------------------------------------|------|-------------|
| 6502          | SKP2    | Homo sapiens S-phase kinase-associated protein 2, E3 ubiquitin protein ligase (SKP2), transcript variant 3, mRNA. | 0.51 | 2.1928E-06  |
| 54894         | RNF43   | Homo sapiens ring finger protein 43 (RNF43), mRNA.                                                                | 0.48 | 0.000165271 |
| 10042293<br>4 | MIR3143 | Homo sapiens microRNA 3143 (MIR3143), microRNA.                                                                   | 0.45 | 3.61889E-06 |
| 6347          | CCL2    | chemokine (C-C motif)                                                                                             | 0.39 | 1.53404E-05 |

### References:

- 1) J. R. Aranzaes, M.-C. Daniel and D. Astruc, *Can. J. Chem.*, 2006, **84**, 288-299; I. Noviandri, K. N. Brown, D. S. Fleming, P. T. Gulyas, P. A. Lay, A. F. Masters and L. Phillips, *The J. Phys. Chem. B*, 1999, **103**, 6713-6722.
